# Supplementary material for: Applying Machine Learning to Ultrafast Shape Recognition in Ligand-Based Virtual Screening
Source: PubMed Central journal article supplement (PMC7042174; doi:10.3389/fphar.2019.01675), 2020-02-19
Supplement: DataSheet_1.pdf [file DataSheet_1.pdf]

## Supplementary Material

### 1 SUPPLEMENTARY DATA

#### 1.1 Figures

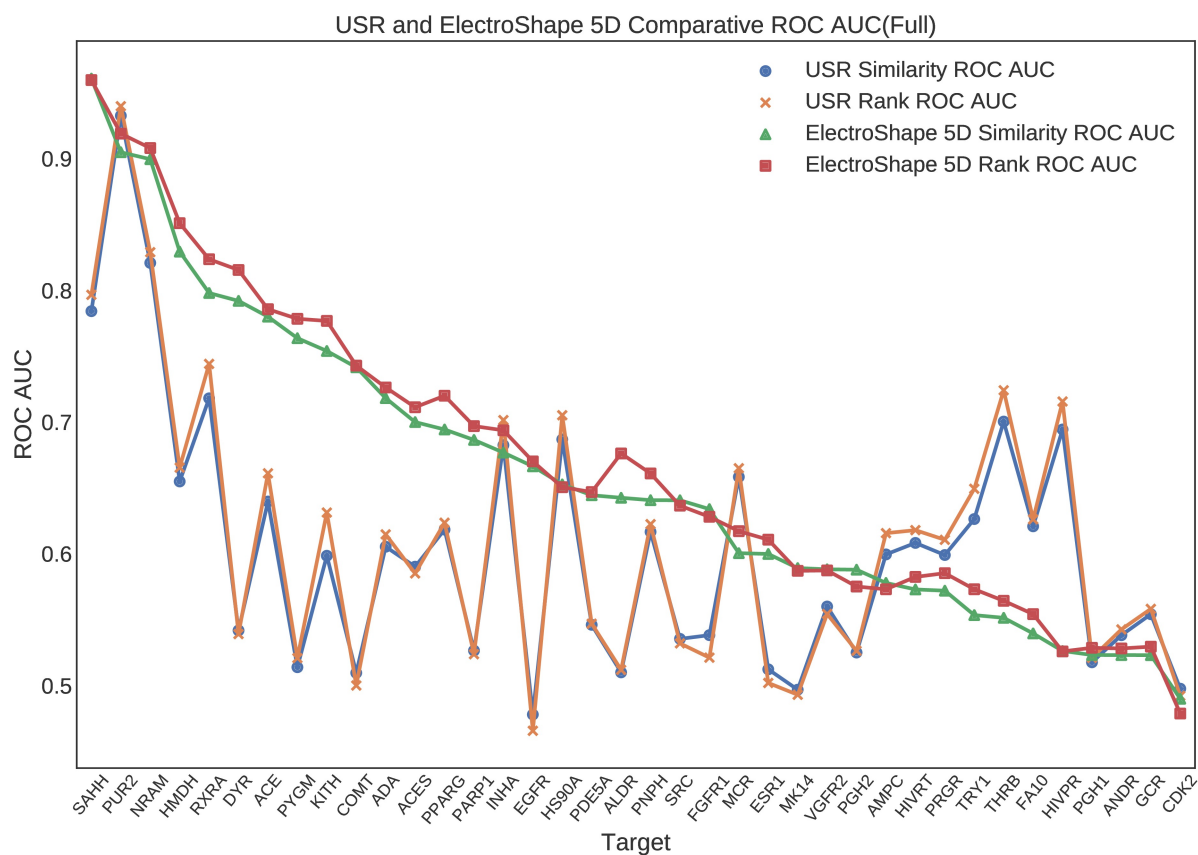

**Figure S1.** USR and ElectroShape 5D comparative AUC performance obtained from retrospective screening using full conformer model.

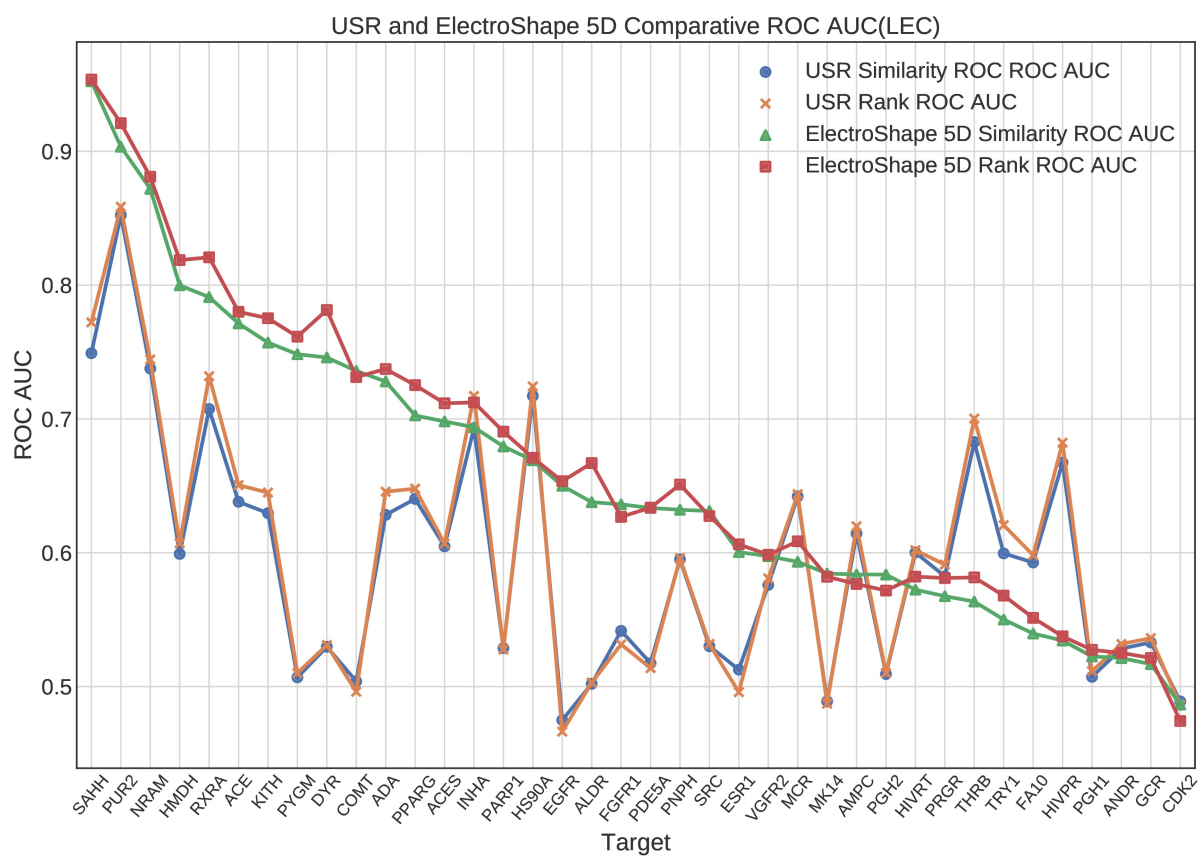

**Figure S2.** USR and ElectroShape 5D comparative AUC performance using Lowest Energy Conformers.

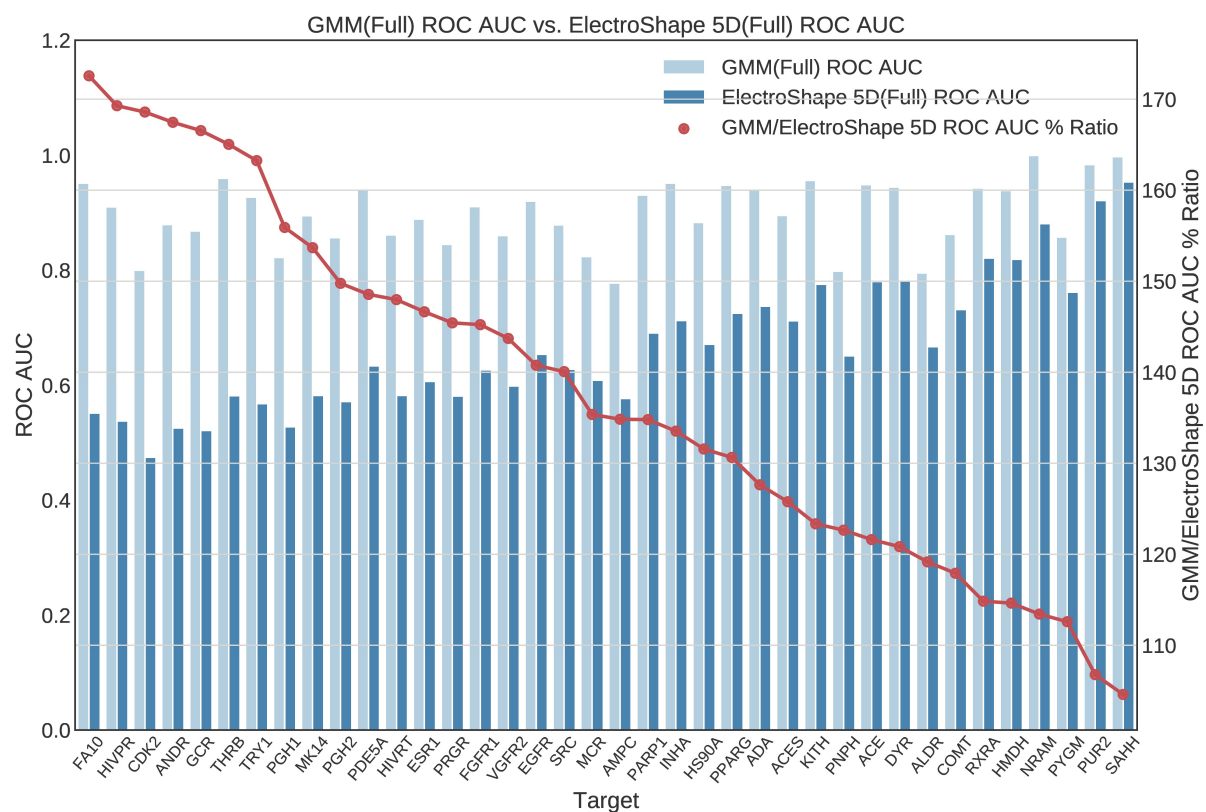

**Figure S3.** Comparative AUC of GMM vs. ElectroShape 5D using full conformer model. Mean improvement 138%. Maximum improvement 173%

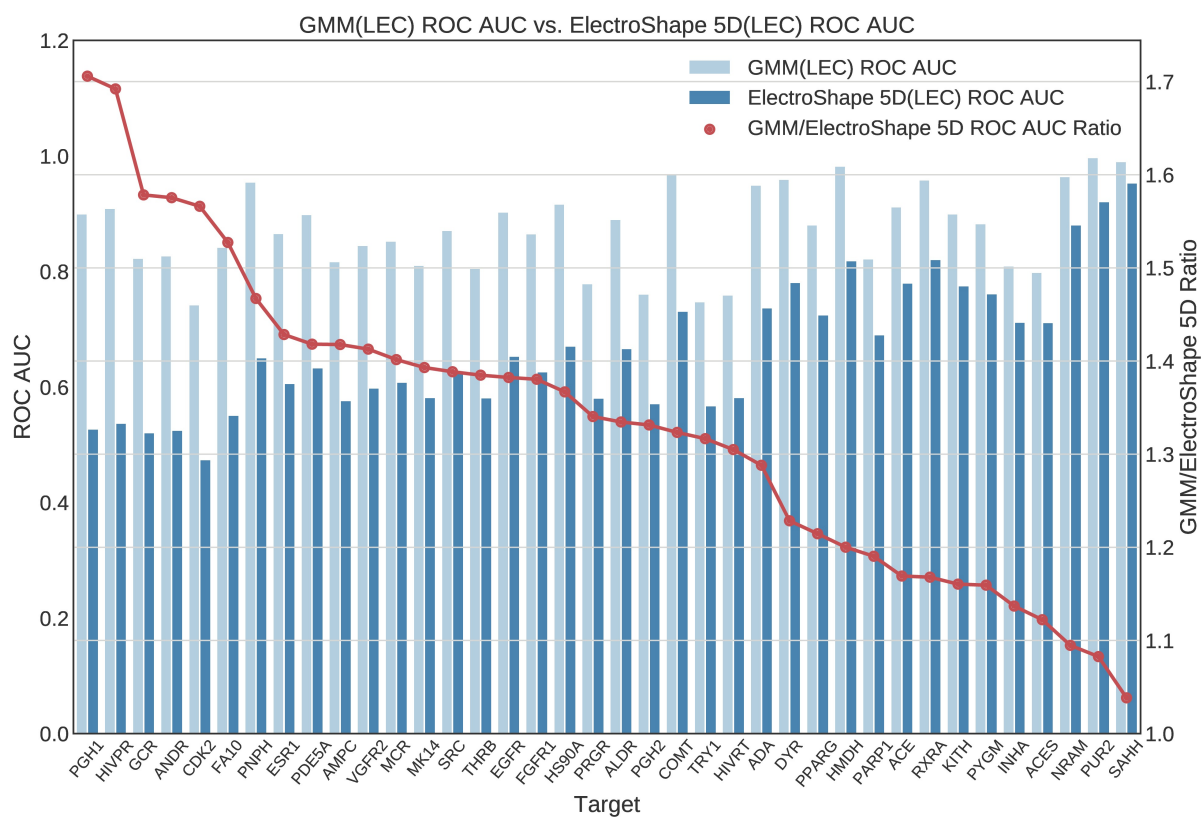

**Figure S4.** Comparative AUC of GMM vs ElectroShape 5D using full conformer model. Mean improvement 133%. Maximum improvement 171%.



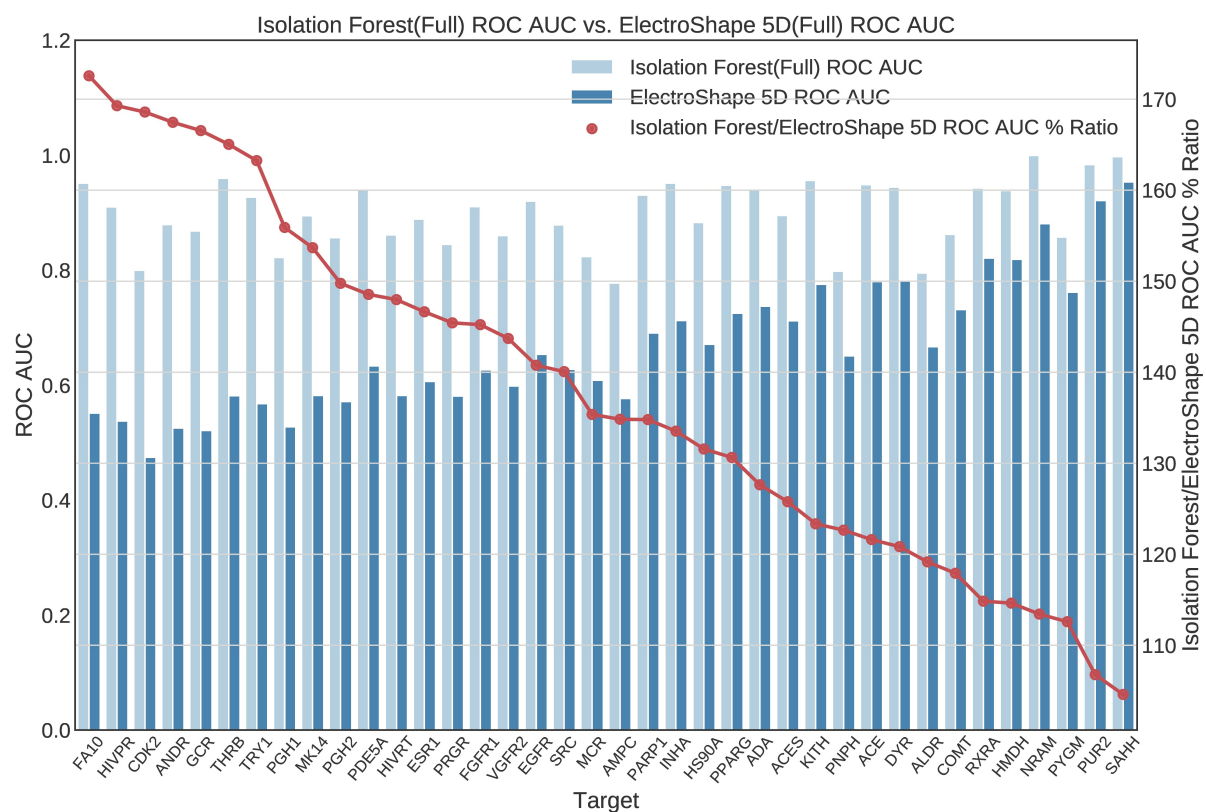

**Figure S5.** Comparative AUC of Isolation Forest vs. ElectroShape 5D using full conformer models. Mean improvement 123%. Maximum improvement 152%.

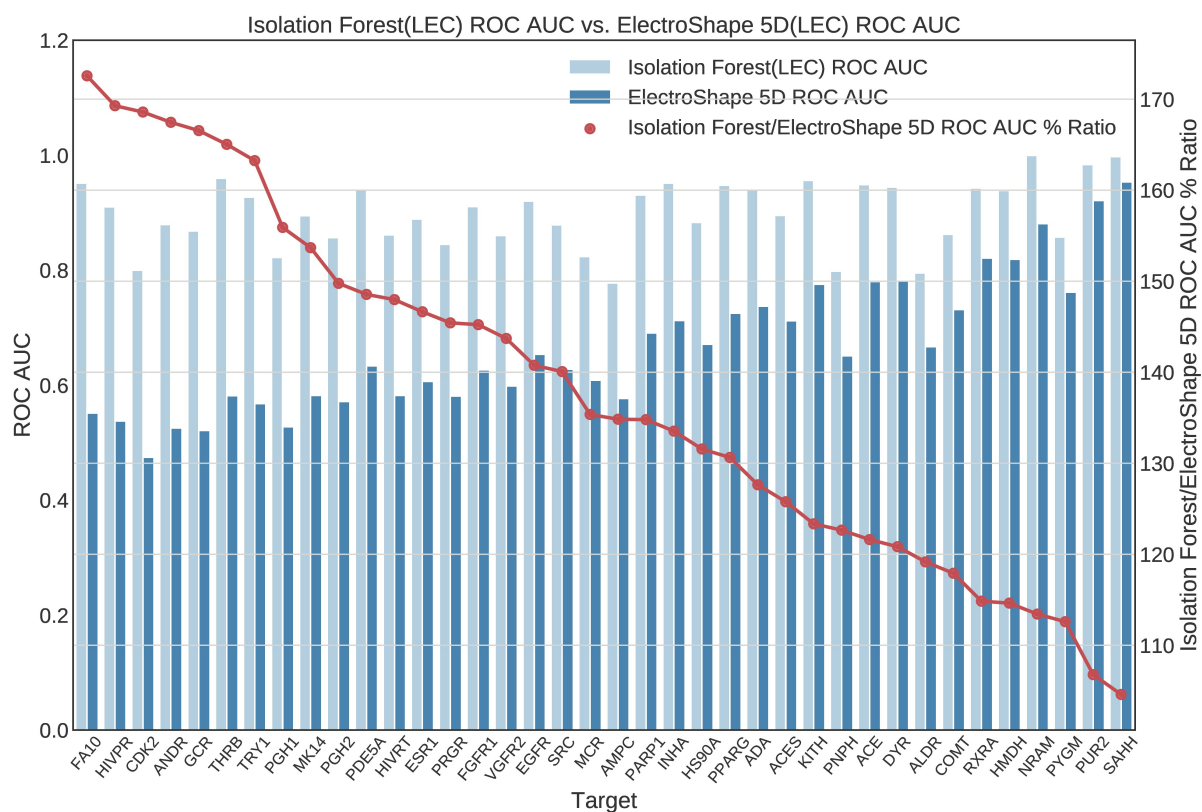

**Figure S6.** Comparative AUC of Isolation Forest vs ElectroShape 5D using full conformer model. Mean improvement 126%. Maximum improvement 155%

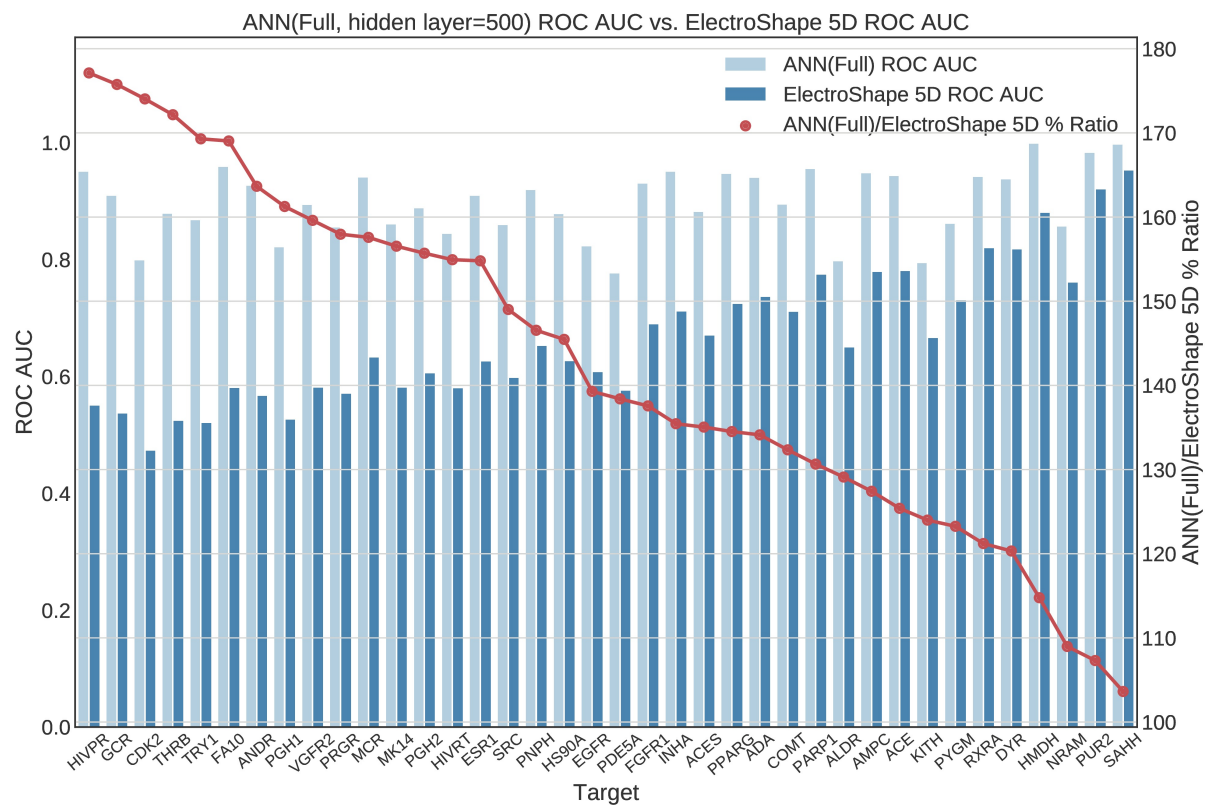

**Figure S7.** Comparative AUC of Neural Network vs. ElectroShape 5D using full conformer model(hidden layer size=500). Mean improvement 143%. Maximum improvement 177%.

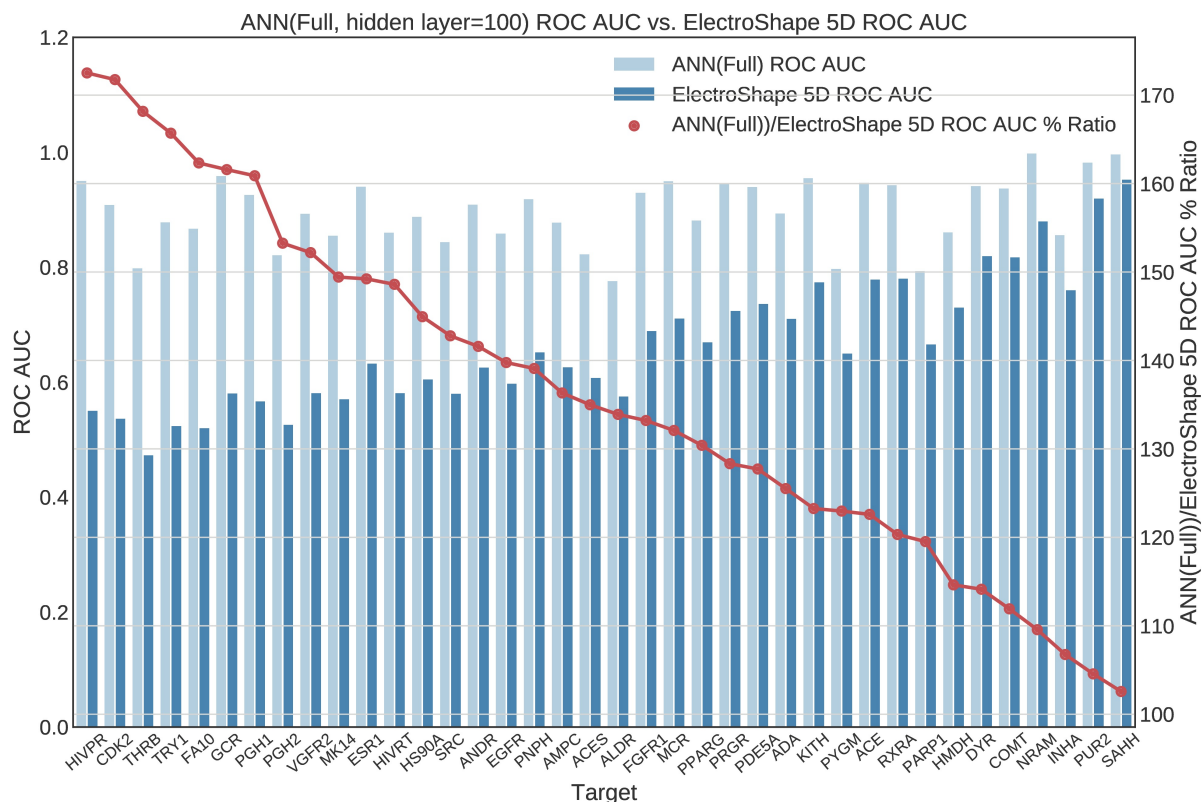

**Figure S8.** Comparative AUC of Neural Network vs. ElectroShape 5D using full conformer model(hidden layer size=100). Mean improvement 136%. Maximum improvement 173%.

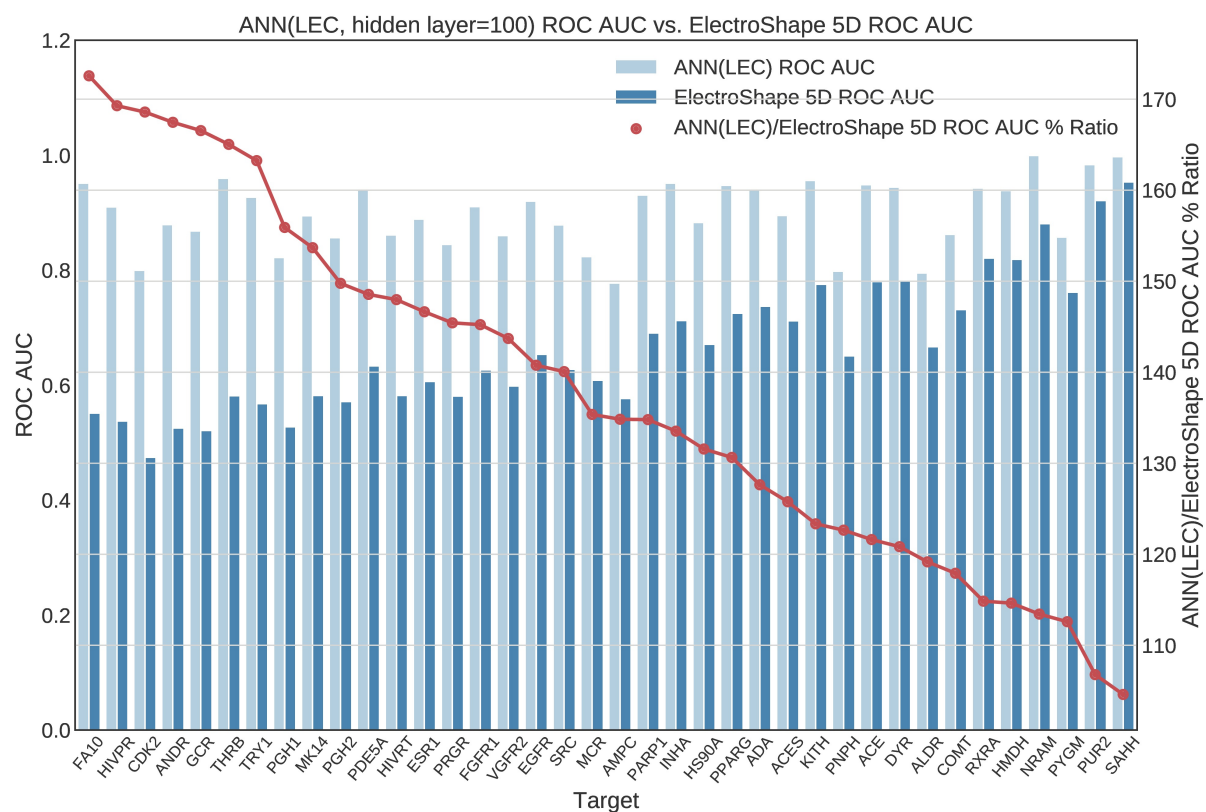

**Figure S9.** Comparative AUC of Neural Network vs. ElectroShape 5D using LECs(hidden layer size=100). Mean improvement 139%. Maximum improvement 175%

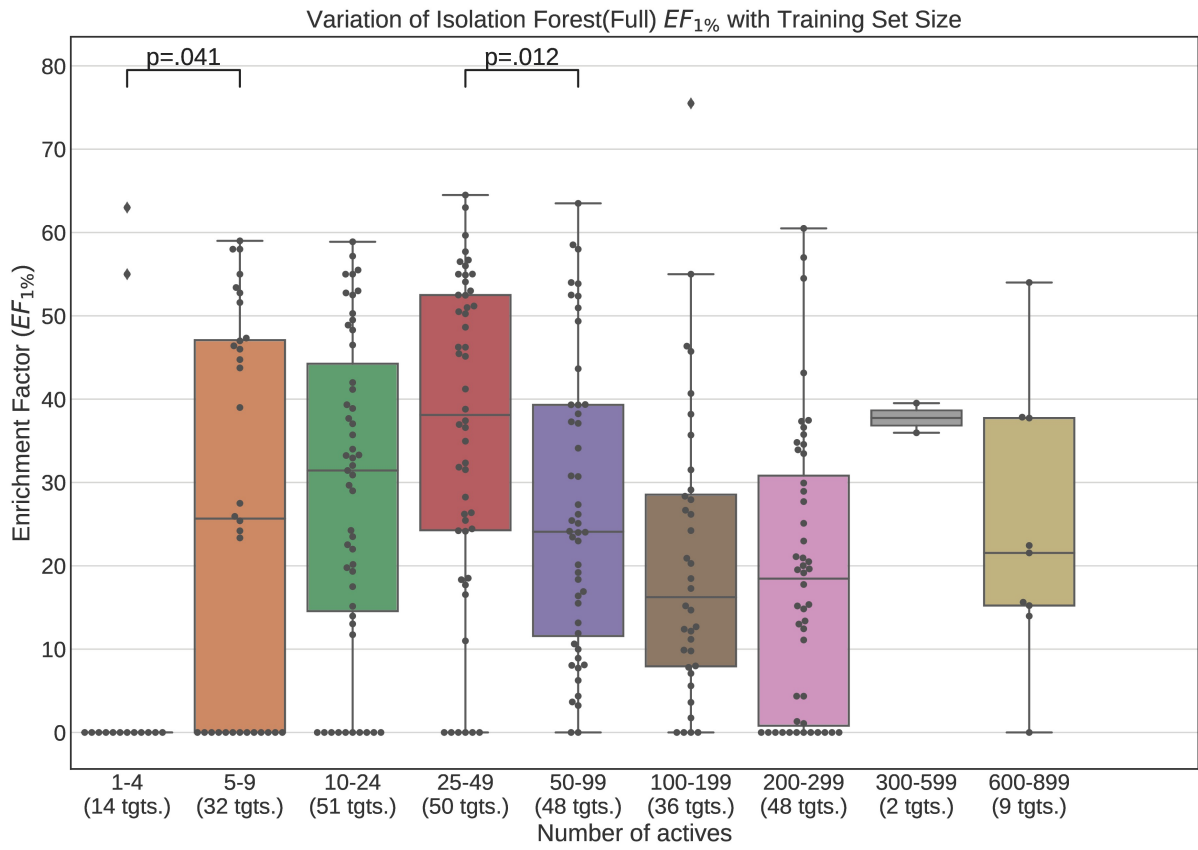

Figure S10. Performance variation of full-conformer model Isolation Forest with number of actives.

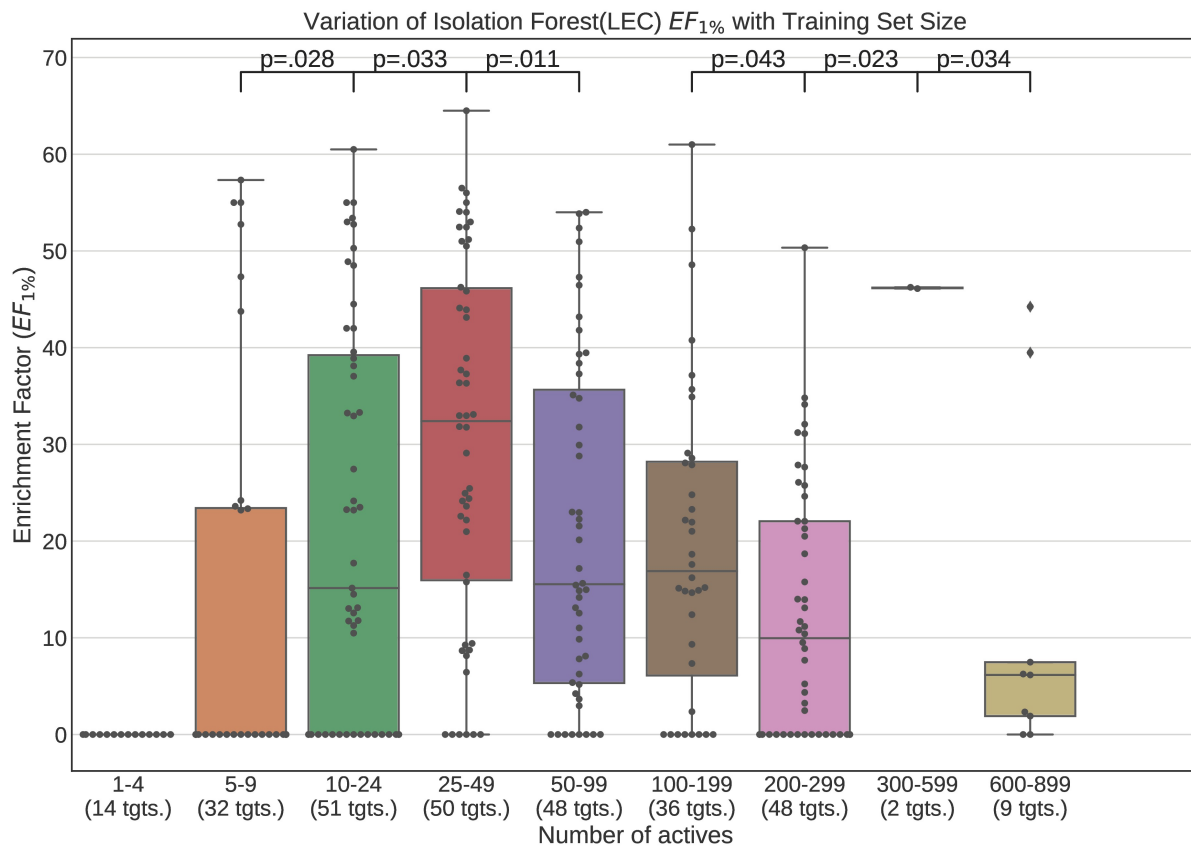

**Figure S11.** Performance variation of LEC model Isolation Forest with number of actives.

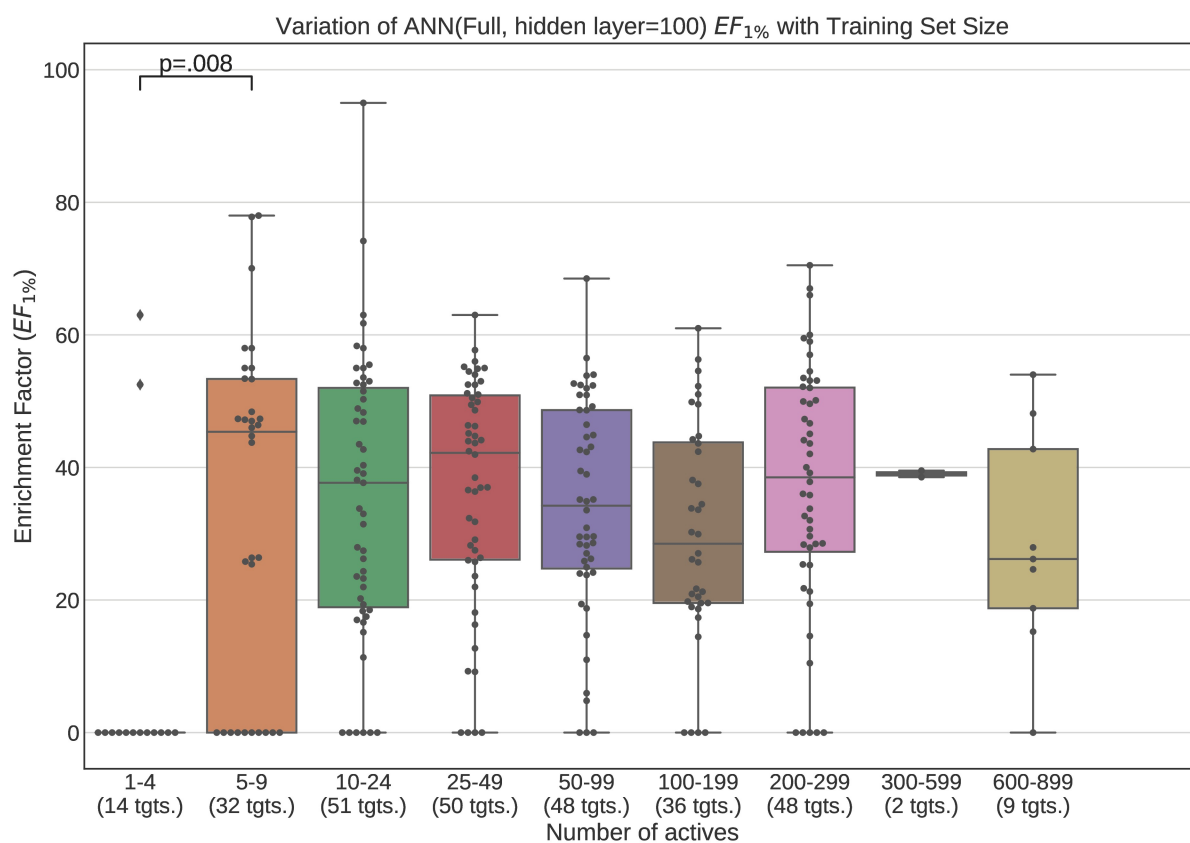

**Figure S12.** Performance variation of full-conformer model neural network (hidden layer size=100) with number of actives.



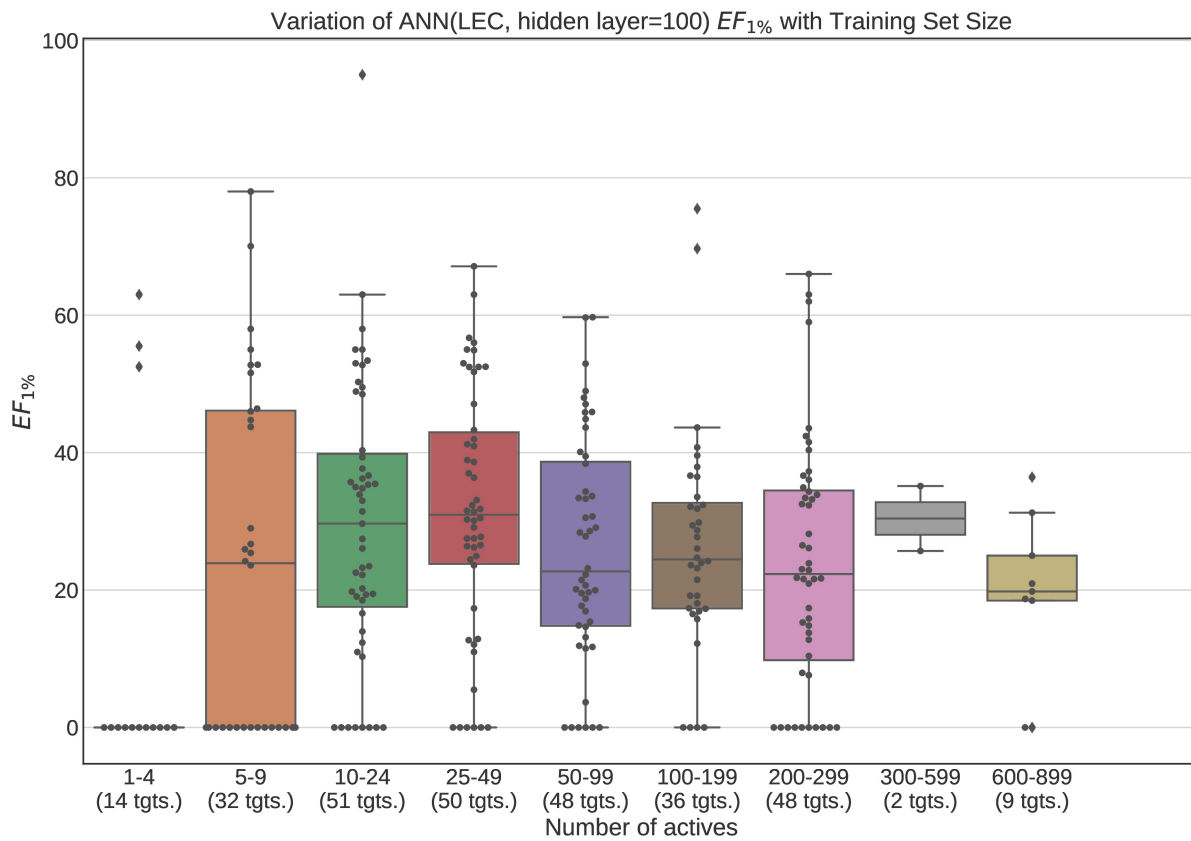

**Figure S13.** Performance variation of LEC model neural network (hidden layer size=100) with number of actives.

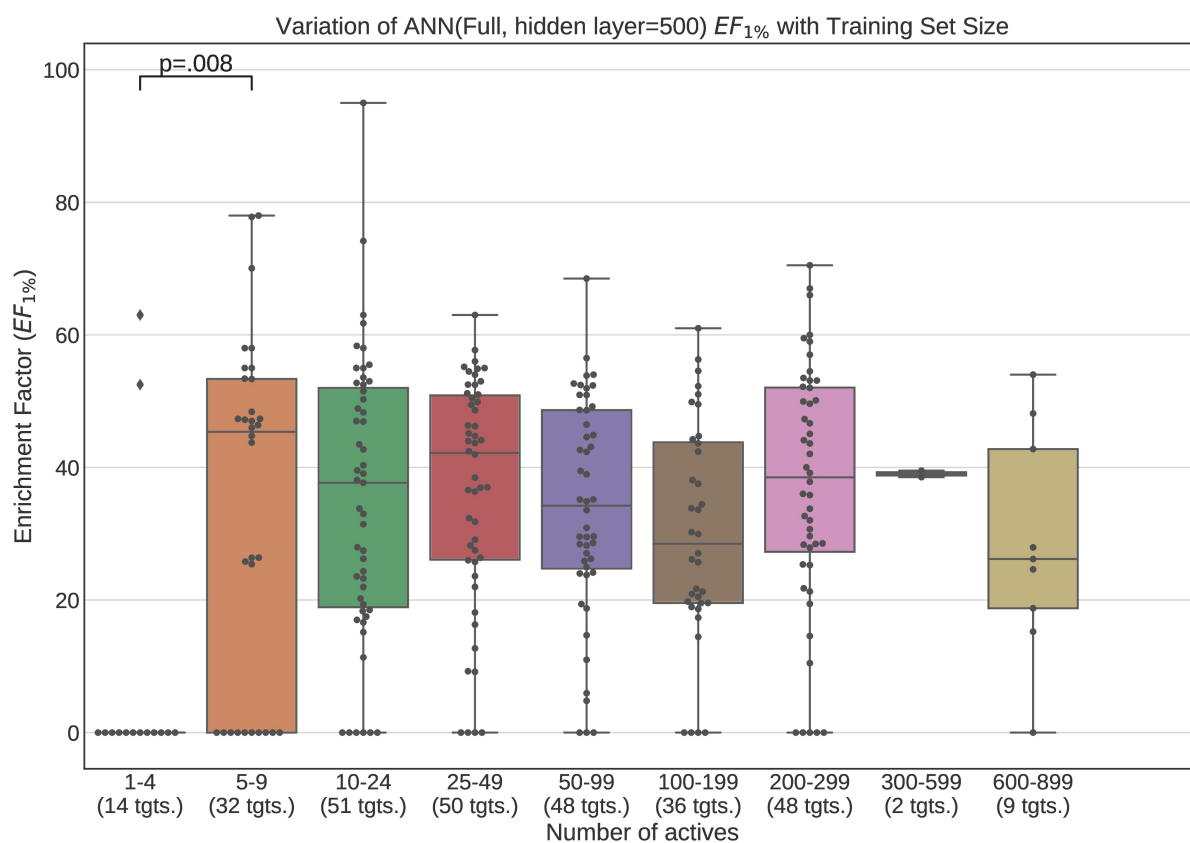

**Figure S14.** Performance variation of full-conformer model neural network (hidden layer size=500) with number of actives.

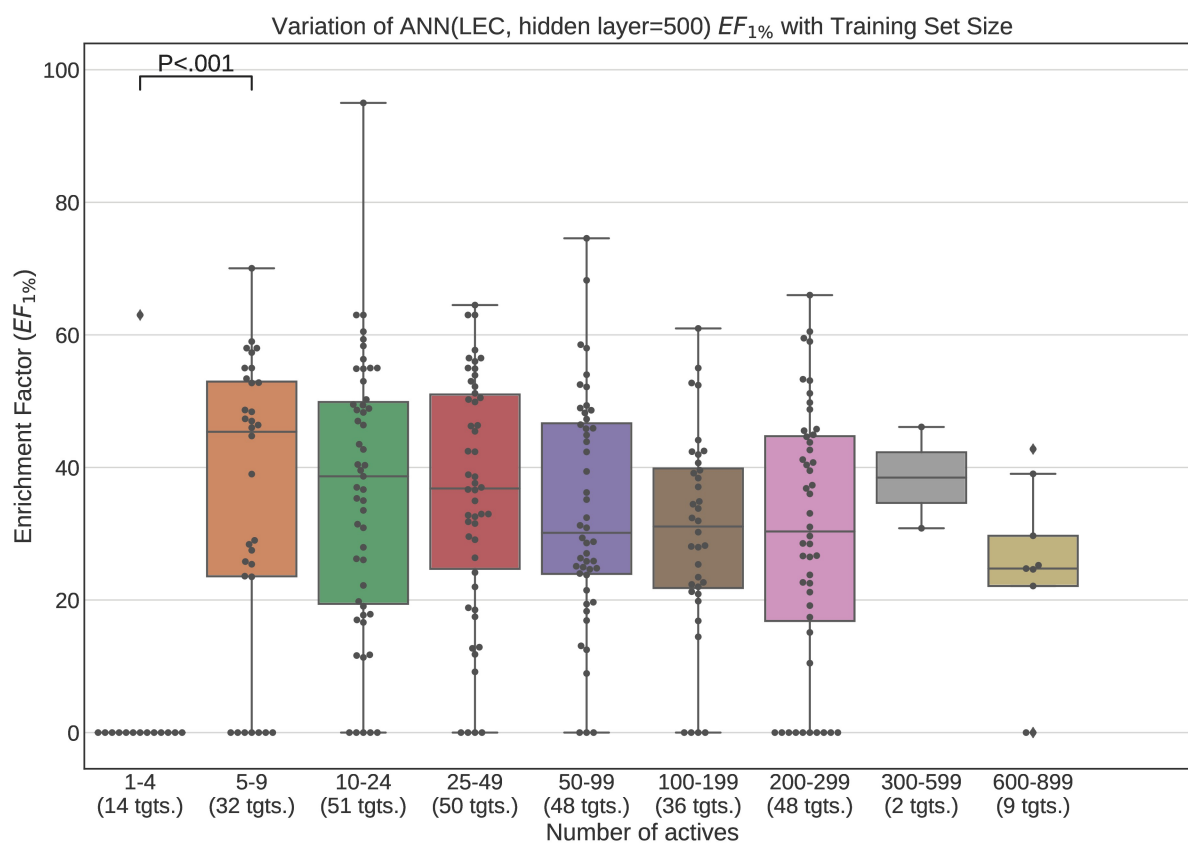

**Figure S15.** Performance variation of LEC model neural network (hidden layer size=500) with number of actives.

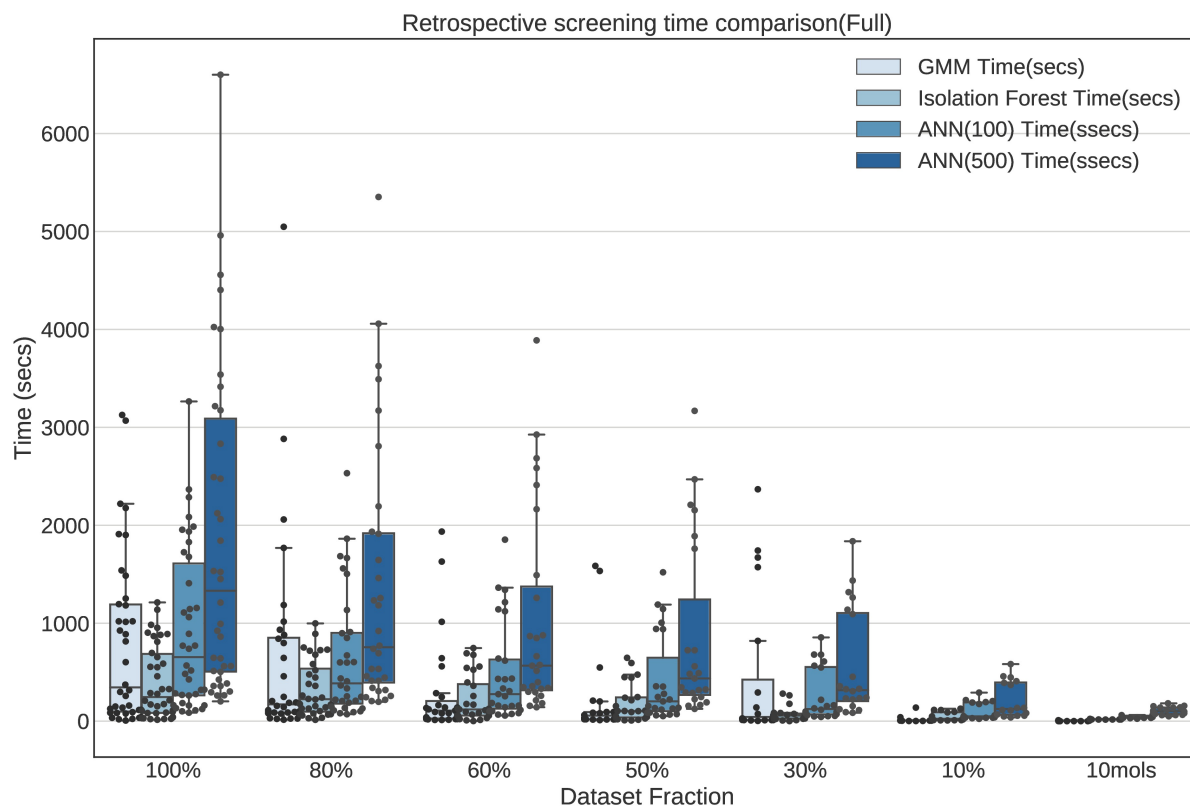

**Figure S16.** Run-time for training and retrospective screening for full conformer models.

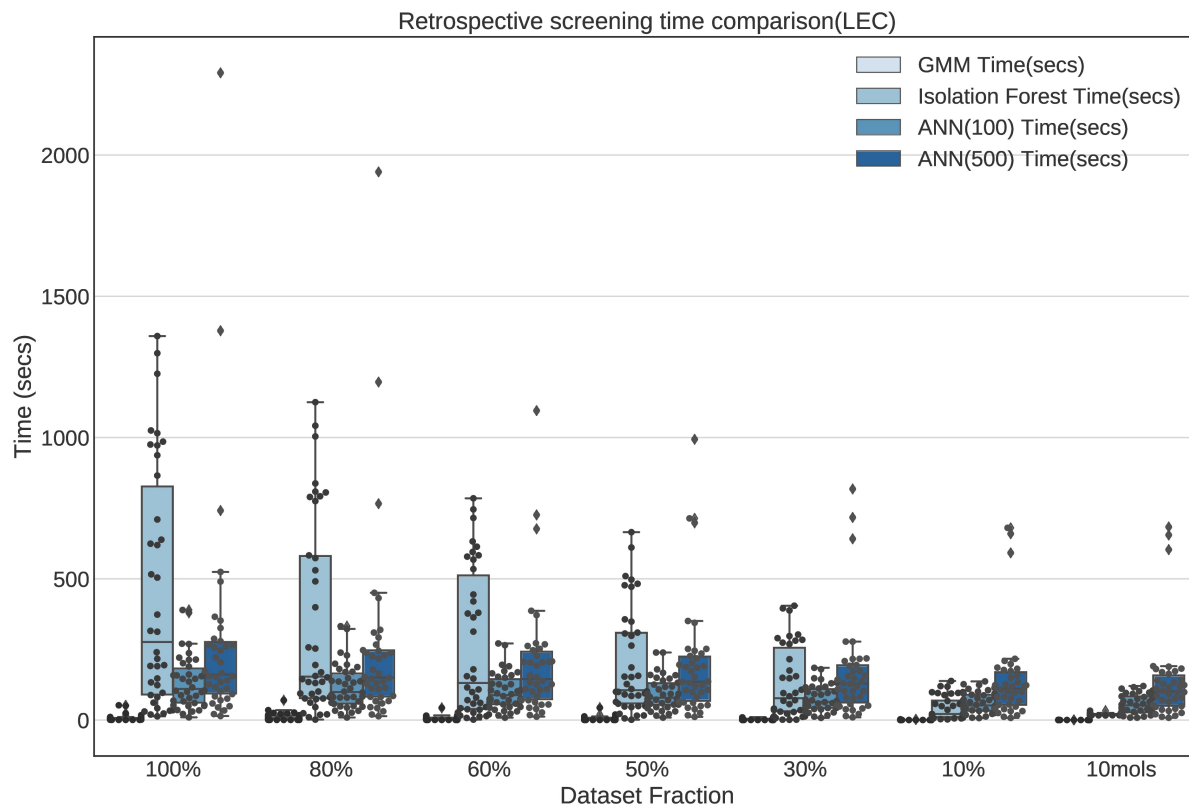

**Figure S17.** Run-time for training and retrospective screening for LEC models.

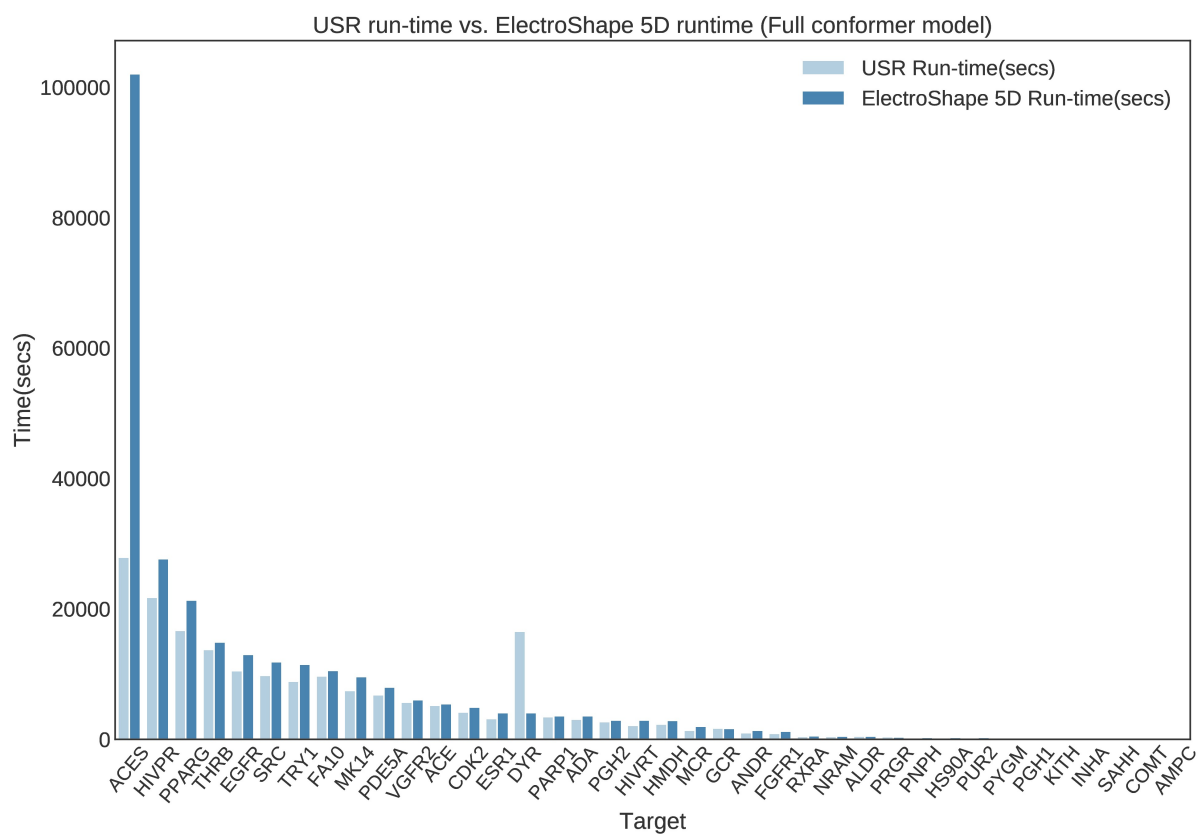

**Figure S18.** Run-time in seconds for USR and ElectroShape 5D retrospective screening using full conformer models.

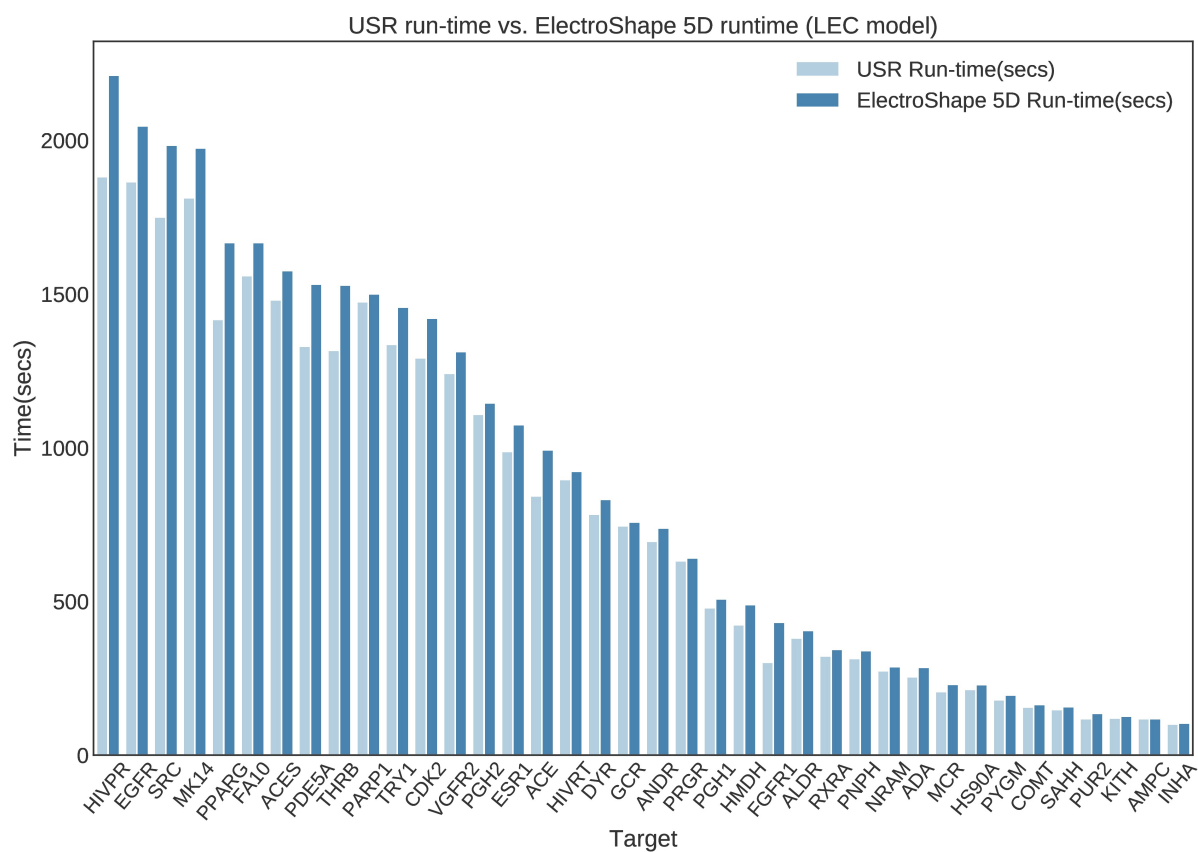

**Figure S19.** Run-time in seconds for USR and ElectroShape 5D retrospective screening using LECs.

## 1.2 Tables

| LEC                   | USR               | ES5                | GMM             | Isolation Forest | ANN(100)        | ANN(500)          |
|-----------------------|-------------------|--------------------|-----------------|------------------|-----------------|-------------------|
| Mean(s) ( $\pm$ s.d.) | 804( $\pm$ 594)   | 883( $\pm$ 661)    | 8( $\pm$ 11)    | 453( $\pm$ 423)  | 134( $\pm$ 92)  | 285( $\pm$ 413)   |
| Max(s)                | 1,882             | 2,212              | 52              | 1,359.00         | 390             | 2,290             |
| Min(s)                | 100               | 104                | 0.7             | 13               | 10              | 14                |
| Full Conformers       | USR               | ES5                | GMM             | Isolation Forest | ANN(100)        | ANN(500)          |
| Mean(s) ( $\pm$ s.d.) | 5021( $\pm$ 6699) | 7409( $\pm$ 16985) | 789( $\pm$ 868) | 397( $\pm$ 373)  | 934( $\pm$ 825) | 1855( $\pm$ 1649) |
| Max(s)                | 27,940            | 102,034            | 3,126           | 1,212            | 3,264           | 6,600             |
| Min(s)                | 59                | 61                 | 6               | 14               | 87              | 202               |

**Table S1.** Tabulated running-time statistics for all LEC and full-conformer models. Timings are shown in seconds and include training and testing.

| Target | Conformers<br>(.sdf) | USR<br>Descriptors | ElectroShape 4D<br>Descriptors | ElectroShape 5D<br>Descriptors |
|--------|----------------------|--------------------|--------------------------------|--------------------------------|
| ACE    | 5.9G                 | 336M               | 419M                           | 493M                           |
| ACES   | 12G                  | 567M               | 706M                           | 834M                           |
| ADA    | 1.5G                 | 90M                | 111M                           | 131M                           |
| ALDR   | 1.5G                 | 106M               | 128M                           | 151M                           |
| AMPC   | 344M                 | 29M                | 35M                            | 41M                            |
| ANDR   | 2.4G                 | 156M               | 190M                           | 223M                           |
| CDK2   | 6.6G                 | 375M               | 461M                           | 542M                           |
| COMT   | 557M                 | 42M                | 51M                            | 60M                            |
| DYR    | 4.1G                 | 240M               | 295M                           | 345M                           |
| EGFR   | 14G                  | 634M               | 791M                           | 933M                           |
| ESR1   | 6.4G                 | 326M               | 403M                           | 475M                           |
| FA10   | 12G                  | 547M               | 684M                           | 807M                           |
| FGFR1  | 3.0G                 | 143M               | 178M                           | 209M                           |
| GCR    | 3.2G                 | 181M               | 223M                           | 262M                           |
| HIVPR  | 19G                  | 888M               | 1.1G                           | 1.3G                           |
| HIVRT  | 3.7G                 | 232M               | 285M                           | 335M                           |
| HMDH   | 4.4G                 | 216M               | 271M                           | 320M                           |
| HS90A  | 1.2G                 | 65M                | 80M                            | 94M                            |
| INHA   | 536M                 | 33M                | 41M                            | 48M                            |
| KITH   | 734M                 | 41M                | 51M                            | 60M                            |
| MCR    | 1001M                | 60M                | 74M                            | 87M                            |
| MK14   | 12G                  | 559M               | 695M                           | 820M                           |
| NRAM   | 1.4G                 | 89M                | 110M                           | 129M                           |
| PARP1  | 5.4G                 | 349M               | 423M                           | 498M                           |
| PDE5A  | 10G                  | 494M               | 617M                           | 729M                           |
| PGH1   | 1.7G                 | 117M               | 142M                           | 168M                           |
| PGH2   | 4.3G                 | 269M               | 328M                           | 388M                           |
| PNPH   | 1000M                | 81M                | 98M                            | 114M                           |
| PPARG  | 14G                  | 656M               | 826M                           | 976M                           |
| PRGR   | 2.5G                 | 166M               | 202M                           | 237M                           |
| PUR2   | 968M                 | 53M                | 66M                            | 78M                            |
| PYGM   | 972M                 | 58M                | 71M                            | 84M                            |
| RXRA   | 1.5G                 | 88M                | 109M                           | 128M                           |
| SAHH   | 412M                 | 35M                | 42M                            | 49M                            |
| SRC    | 13G                  | 610M               | 762M                           | 898M                           |
| THRB   | 12G                  | 561M               | 702M                           | 828M                           |
| TRY1   | 11G                  | 512M               | 638M                           | 751M                           |
| VGFR2  | 8.2G                 | 404M               | 503M                           | 592M                           |

**Table S2.** The sizes on disk of the datasets generated/used in our experiments. Here it can be seen that the space required to store the 3D conformer data generated from the 2D SMILES representations of the compound datasets is orders of magnitude more than that required for the much condensed USR family of descriptors.
